# Supplementary material for: Pressure and temperature dependence of fluorescence anisotropy of green fluorescent protein
Source: Royal Society of Chemistry journal article supplement (doi:10.1039/d1ra08977c), 2022-01-01
Supplement: d1ra08977c1.pdf [file d1ra08977c1.pdf]

## Supplementary Information: Effect of hydrostatic pressure and temperature on the fluorescence anisotropy of Green Fluorescent Protein

Harpreet Kaur, Khanh Nguyen and Pradeep Kumar

March 10, 2022

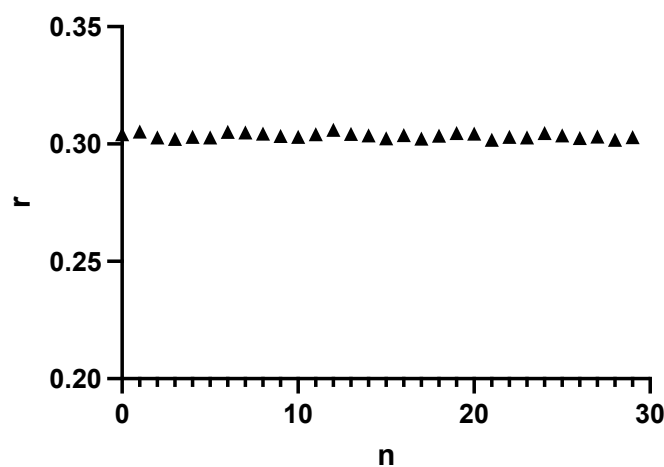

Figure S1: Steady state fluorescence anisotropy measurements at  $T = 10^{\circ}\text{C}$  and  $p = 0.1 \text{ MPa}$ .

Table S1: Temperature and pressure dependence of the viscosity of water

| T (°C) | p (MPa) | $\eta$ (mPa.s) | T (°C) | p (MPa) | $\eta$ (mPa.s) |
|--------|---------|----------------|--------|---------|----------------|
| 10     | 0.1     | 1.305898       | 40     | 0.1     | 0.652728       |
| 10     | 20.0    | 1.289768       | 40     | 20.0    | 0.655470       |
| 10     | 40.0    | 1.277195       | 40     | 40.0    | 0.658745       |
| 10     | 60.0    | 1.268064       | 40     | 60.0    | 0.662552       |
| 10     | 80.0    | 1.262156       | 40     | 80.0    | 0.666889       |
| 10     | 100.0   | 1.259251       | 40     | 100.0   | 0.671752       |
| 10     | 120.0   | 1.259141       | 40     | 120.0   | 0.677132       |
| 10     | 140.0   | 1.261639       | 40     | 140.0   | 0.683026       |
| 10     | 160.0   | 1.266588       | 40     | 160.0   | 0.689430       |
| 10     | 180.0   | 1.273871       | 40     | 180.0   | 0.696349       |
| 10     | 200.0   | 1.283412       | 40     | 200.0   | 0.703797       |
| 20     | 0.1     | 1.001594       | 50     | 0.1     | 0.546520       |
| 20     | 20.0    | 0.996392       | 50     | 20.0    | 0.550640       |
| 20     | 40.0    | 0.992992       | 50     | 40.0    | 0.555055       |
| 20     | 60.0    | 0.991367       | 50     | 60.0    | 0.559760       |
| 20     | 80.0    | 0.991443       | 50     | 80.0    | 0.564764       |
| 20     | 100.0   | 0.993139       | 50     | 100.0   | 0.570072       |
| 20     | 120.0   | 0.996373       | 50     | 120.0   | 0.575687       |
| 20     | 140.0   | 1.001071       | 50     | 140.0   | 0.581614       |
| 20     | 160.0   | 1.007169       | 50     | 160.0   | 0.587864       |
| 20     | 180.0   | 1.014619       | 50     | 180.0   | 0.594449       |
| 20     | 200.0   | 1.023397       | 50     | 200.0   | 0.601393       |
| 30     | 0.1     | 0.797219       | 60     | 0.1     | 0.466041       |
| 30     | 20.0    | 0.797292       | 60     | 20.0    | 0.470869       |
| 30     | 40.0    | 0.798333       | 60     | 40.0    | 0.475852       |
| 30     | 60.0    | 0.800333       | 60     | 60.0    | 0.480983       |
| 30     | 80.0    | 0.803273       | 60     | 80.0    | 0.486275       |
| 30     | 100.0   | 0.807125       | 60     | 100.0   | 0.491738       |
| 30     | 120.0   | 0.811859       | 60     | 120.0   | 0.497381       |
| 30     | 140.0   | 0.817447       | 60     | 140.0   | 0.503216       |
| 30     | 160.0   | 0.823868       | 60     | 160.0   | 0.509259       |
| 30     | 180.0   | 0.831107       | 60     | 180.0   | 0.515531       |
| 30     | 200.0   | 0.839165       | 60     | 200.0   | 0.522060       |
